# Supplementary material for: Mechanistic studies on the palladium-catalyzed cross-dehydrogenative coupling of 4-phenoxy-2-coumarins: experimental and computational insights
Source: Royal Society of Chemistry journal article supplement (doi:10.1039/c8dt00842f), 2018-01-01
Supplement: c8dt00842f2.pdf [file c8dt00842f2.pdf]

## Cartesian coordinates for all the species calculated in this study

### **coumarin**

**E= -803.035008 a.u.**

**G= -802.860386 a.u.**

6 4.232066 -1.293417 -0.000075  
6 3.902012 0.052082 -0.000089  
6 2.557359 0.416090 -0.000012  
6 1.546942 -0.549658 0.000059  
6 1.900591 -1.906504 0.000059  
6 3.234118 -2.275023 0.000001  
1 5.277686 -1.584575 -0.000127  
1 4.658791 0.828564 -0.000144  
6 0.178577 -0.069104 0.000058  
1 1.118102 -2.656977 0.000099  
1 3.504869 -3.325477 0.000002  
6 -0.084478 1.260294 0.000057  
6 0.985564 2.229243 0.000225  
1 -1.090105 1.658937 -0.000035  
8 2.277980 1.749140 0.000013  
8 -0.749471 -1.042722 0.000033  
8 0.849465 3.434370 -0.000234  
6 -2.097293 -0.684909 0.000017  
6 -2.752300 -0.537502 -1.214598  
6 -2.752329 -0.537501 1.214616  
6 -4.110836 -0.232772 -1.207022  
1 -2.203837 -0.661432 -2.142431  
6 -4.110863 -0.232770 1.207008  
1 -2.203887 -0.661428 2.142463  
6 -4.789470 -0.080325 -0.000015  
1 -4.637231 -0.114494 -2.148775  
1 -4.637281 -0.114488 2.148749  
1 -5.848867 0.155706 -0.000027

### **IM1**

**E= -1386.634278 a.u.**

**G= -1386.371933 a.u.**

6 4.165007 -2.577089 -0.643924  
6 3.832400 -1.895487 0.514769  
6 2.510932 -1.507782 0.711927  
6 1.527013 -1.804913 -0.238952  
6 1.881477 -2.507491 -1.402425  
6 3.193165 -2.887180 -1.604977  
1 5.196370 -2.873307 -0.806166  
1 4.570743 -1.649571 1.269023  
6 0.179286 -1.363980 0.036821  
1 1.114824 -2.734169 -2.134876  
1 3.471359 -3.422885 -2.505722  
6 -0.065646 -0.510890 1.129443  
6 0.972432 -0.394736 2.170593  
1 -1.073352 -0.330884 1.494886  
8 2.229641 -0.860364 1.875104  
8 -0.731332 -1.847605 -0.783145  
8 0.801332 0.090125 3.260107  
6 -2.107884 -1.661606 -0.586025  
6 -2.807725 -1.067681 -1.623228  
6 -2.727129 -2.145571 0.556018  
6 -4.186610 -0.933870 -1.496073  
1 -2.276458 -0.705865 -2.496051  
6 -4.104782 -1.989445 0.673285  
1 -2.148113 -2.624291 1.338514

6 -4.833521 -1.386529 -0.348276  
1 -4.752638 -0.466621 -2.295139  
1 -4.605973 -2.346346 1.566562  
1 -5.907559 -1.268600 -0.249316  
46 0.281688 1.249709 -0.069407  
8 -1.631806 1.605226 -0.468894  
6 -2.620465 1.573020 0.380412  
8 -2.579099 1.110454 1.517781  
6 -3.877424 2.219280 -0.161943  
6 2.330487 2.467514 -0.695988  
8 1.203402 2.948361 -1.020609  
8 2.339134 1.362747 -0.045953  
6 3.606029 3.135973 -1.078541  
1 4.439359 2.730455 -0.504068  
1 3.517847 4.212973 -0.921097  
1 3.784888 2.963375 -2.144464  
1 -3.952075 2.102888 -1.244140  
1 -3.835603 3.290641 0.062069  
1 -4.753703 1.794821 0.330095

### **IM2**

**E= -1386.640548 a.u.**

**G= -1386.375971 a.u.**

6 -5.956092 -0.288036 -0.217247  
6 -5.194568 0.801836 0.172072  
6 -3.806119 0.697261 0.146008  
6 -3.169470 -0.474762 -0.265765  
6 -3.958328 -1.567007 -0.656208  
6 -5.339249 -1.473925 -0.630965  
1 -7.038986 -0.216303 -0.199225  
1 -5.646292 1.732184 0.498246  
6 -1.713820 -0.484346 -0.266613  
1 -3.471824 -2.480842 -0.977457  
1 -5.943281 -2.323043 -0.933496  
6 -1.010654 0.607178 0.128698  
6 -1.719945 1.793519 0.567496  
1 3.162807 0.046210 1.228375  
8 -3.095919 1.789394 0.540218  
8 -1.210682 -1.674065 -0.678250  
8 -1.198015 2.816930 0.970758  
6 0.142392 -1.838064 -0.937155  
6 0.906557 -2.560222 -0.027927  
6 0.679957 -1.359069 -2.125693  
6 2.257660 -2.761400 -0.295528  
1 0.441941 -2.933939 0.878414  
6 2.032175 -1.568212 -2.381583  
1 0.052925 -0.801720 -2.813125  
6 2.823676 -2.257296 -1.465522  
1 2.869363 -3.312433 0.411923  
1 2.468063 -1.180268 -3.296936  
1 3.878863 -2.412135 -1.666679  
46 0.936837 0.808113 0.224465  
8 0.929622 -0.160021 2.103138  
6 1.971007 -0.622550 2.585017  
8 3.162163 -0.490848 2.050612  
6 1.963457 -1.398667 3.857880  
6 2.684188 1.617713 -1.361191  
8 3.059617 1.176481 -0.226558  
8 1.441539 1.687536 -1.622751

6 3.688089 2.081249 -2.366717  
1 3.294118 1.965459 -3.377582  
1 4.622972 1.531175 -2.248010  
1 3.887558 3.143823 -2.193229  
1 0.943986 -1.512421 4.222571  
1 2.571656 -0.875612 4.601196  
1 2.419577 -2.377819 3.687956

### IM3-2

E= -1386.648735 a.u.

G= -1386.383172 a.u.

46 0.898512 0.037489 0.227109  
6 -1.031614 0.349299 -0.056139  
6 -1.862088 -0.705406 0.124559  
6 -3.298272 -0.600023 0.039470  
6 -3.800781 0.667092 -0.269054  
6 -1.593150 1.613674 -0.485041  
8 2.935746 -0.369112 0.663451  
6 3.762702 0.039258 -0.208959  
8 3.488516 0.870157 -1.114041  
6 5.157774 -0.536267 -0.165637  
1 -0.072783 -1.345121 -1.863284  
6 0.536372 -1.797853 -1.087855  
6 -0.038677 -2.160572 0.154730  
6 1.810880 -2.321464 -1.416682  
8 -1.375003 -1.936779 0.430736  
1 5.888934 0.273729 -0.094838  
1 5.349546 -1.060902 -1.106872  
1 5.281801 -1.225517 0.669969  
6 0.650876 -2.995534 1.052665  
6 1.898967 -3.466047 0.704629  
1 2.583069 2.037314 -0.773969  
8 1.057218 1.948735 1.120828  
6 1.409395 2.964365 0.490958  
8 2.174771 2.955488 -0.552088  
6 0.991287 4.317464 0.967921  
1 0.950188 5.018192 0.133650  
1 1.732835 4.677768 1.688675  
1 0.022584 4.249386 1.461822  
6 -4.193143 -1.657105 0.259052  
6 -5.556094 -1.434847 0.175657  
6 -6.041978 -0.157290 -0.129359  
6 -5.171626 0.897281 -0.354549  
1 -3.801665 -2.640465 0.496367  
1 -6.250057 -2.250794 0.347437  
1 -7.111863 0.012728 -0.194708  
1 -5.527130 1.892682 -0.596922  
8 -2.972009 1.719296 -0.514114  
8 -0.980163 2.601977 -0.836578  
6 2.481807 -3.136013 -0.533108  
1 0.174205 -3.260888 1.989417  
1 2.437523 -4.104941 1.396714  
1 3.460510 -3.528319 -0.787016  
1 2.242305 -2.067497 -2.378545

### IM3

E= -1386.630182 a.u.

G= -1386.369956 a.u.

46 0.957505 0.007571 0.041958  
6 -0.993152 0.297977 0.204858  
6 -1.914749 -0.580826 -0.262887  
6 -3.312085 -0.243762 -0.410786

6 -3.689582 1.030596 0.018844  
6 -1.479392 1.511602 0.844355  
8 3.100110 -0.027902 -0.021034  
6 3.731496 -0.312146 -1.130049  
8 3.210745 -0.880243 -2.086717  
6 5.183593 0.110816 -1.141546  
1 0.901605 -1.972563 -1.590713  
6 0.798468 -2.268281 -0.548949  
6 -0.464198 -2.324963 0.054382  
6 1.886324 -2.855188 0.136282  
8 -1.567926 -1.843150 -0.629015  
1 5.248910 1.197615 -1.026052  
1 5.663360 -0.186745 -2.074180  
1 5.709020 -0.337840 -0.293649  
6 -0.660009 -2.919082 1.301946  
6 0.427302 -3.480732 1.950102  
1 3.232778 1.396816 0.525239  
8 1.142523 2.104122 -0.276651  
6 2.023326 2.835959 0.205436  
8 3.144560 2.398017 0.699585  
6 1.805741 4.310225 0.267085  
1 1.324011 4.646377 -0.652517  
1 2.739858 4.845056 0.436399  
1 1.113637 4.504637 1.093259  
6 -4.276944 -1.090255 -0.974490  
6 -5.581543 -0.649828 -1.114732  
6 -5.938539 0.636166 -0.691484  
6 -4.999548 1.481270 -0.120931  
1 -3.984556 -2.082283 -1.301881  
1 -6.328433 -1.302998 -1.553445  
1 -6.962502 0.977872 -0.804614  
1 -5.257127 2.476329 0.224838  
8 -2.798502 1.862933 0.624497  
8 -0.853432 2.244470 1.581492  
6 1.703014 -3.446858 1.371843  
1 -1.655202 -2.937201 1.732366  
1 0.285862 -3.952219 2.917485  
1 2.543799 -3.897780 1.887660  
1 2.858005 -2.845442 -0.343200

### IM4

E= -1386.649330 a.u.

G= -1386.383946 a.u.

46 0.943277 -0.192373 -0.112182  
6 -1.008004 -0.378999 -0.244573  
6 -1.909076 0.543058 0.165911  
6 -3.321832 0.239531 0.304799  
6 -3.729945 -1.043609 -0.064108  
6 -1.505342 -1.654562 -0.738776  
8 3.191522 -0.124649 0.034321  
6 3.875690 0.552753 0.808121  
8 3.392092 1.585872 1.455367  
6 5.312542 0.257239 1.069422  
1 2.458634 1.732122 1.207056  
6 0.633342 1.718748 -0.490200  
6 -0.486952 2.424890 -0.051840  
6 1.651691 2.475685 -1.096796  
8 -1.601651 1.819616 0.499062  
1 5.394655 -0.758416 1.466080  
1 5.744825 0.968449 1.771885  
1 5.854175 0.288022 0.120428  
6 -0.579474 3.812826 -0.138278

6 0.457500 4.534112 -0.714446  
1 3.287482 -1.840675 -0.434127  
8 1.261432 -2.310714 0.596669  
6 2.013339 -3.137183 0.086942  
8 3.146412 -2.810534 -0.509715  
6 1.698366 -4.595588 0.071032  
1 2.576670 -5.199557 -0.156141  
1 0.935671 -4.753785 -0.698707  
1 1.263457 -4.882690 1.029613  
6 -4.280994 1.139742 0.789534  
6 -5.604330 0.750199 0.908166  
6 -5.991040 -0.543385 0.539962  
6 -5.058874 -1.444657 0.050487  
1 -3.969770 2.139860 1.069990  
1 -6.342268 1.450755 1.285188  
1 -7.029324 -0.846021 0.633018  
1 -5.334551 -2.449963 -0.249092  
8 -2.846783 -1.945583 -0.573799  
8 -0.854581 -2.510593 -1.307671  
6 1.572585 3.861675 -1.209134  
1 -1.472429 4.304200 0.235331  
1 0.385332 5.614556 -0.790752  
1 2.380876 4.412506 -1.680848  
1 2.533159 1.967628 -1.479782

**IM5**

**E= -1386.651534 a.u.**

**G= -1386.385152 a.u.**

46 -1.111908 0.043728 0.009358  
6 -0.727949 1.970165 -0.086830  
6 0.464881 2.559417 0.321475  
6 0.622014 3.940360 0.430913  
6 -0.430455 4.776710 0.089120  
6 -1.626643 4.223957 -0.364403  
6 -1.768025 2.842193 -0.446092  
8 -1.702170 -2.134100 0.381259  
6 -0.992663 -3.017288 0.865596  
8 0.061422 -2.738089 1.601976  
6 -1.229266 -4.468384 0.644453  
1 1.574094 4.336385 0.770453  
1 -0.311816 5.853002 0.166423  
1 -2.452740 4.868682 -0.650245  
1 -2.714292 2.429041 -0.779708  
1 0.176900 -1.771229 1.655517  
6 0.830787 -0.216799 -0.290800  
6 1.814643 0.619036 0.128629  
6 1.227012 -1.446932 -0.959735  
8 0.475919 -2.259006 -1.473700  
8 1.605083 1.843660 0.650801  
1 -2.288244 -4.652202 0.463996  
1 -0.863261 -5.061964 1.482346  
1 -0.668251 -4.746533 -0.254865  
6 3.221454 0.263894 0.064791  
6 3.537600 -0.960301 -0.524589  
6 5.869840 -0.594144 -0.138723  
6 4.855396 -1.398505 -0.632357  
6 4.263080 1.068457 0.549386  
6 5.575697 0.640248 0.452195  
1 6.900286 -0.926055 -0.217245  
1 5.057497 -2.355225 -1.101349  
1 4.023284 2.024690 1.000641  
1 6.377530 1.265337 0.831156

8 2.566762 -1.768441 -1.030837  
1 -3.256569 -1.931797 -0.282313  
8 -3.322254 0.358141 0.234856  
6 -4.270283 -0.331513 -0.138413  
8 -4.170499 -1.605053 -0.457762  
6 -5.656272 0.211110 -0.271189  
1 -6.004134 0.065148 -1.297751  
1 -5.671898 1.269781 -0.017016  
1 -6.329778 -0.345543 0.386197

**IM6**

**E= -1386.627304 a.u.**

**G= -1386.360049 a.u.**

6 -4.950539 0.107341 0.244069  
6 -4.193070 1.267871 0.212007  
6 -2.867422 1.216993 0.635135  
6 -2.302314 0.023615 1.096106  
6 -3.078152 -1.144266 1.103936  
6 -4.395722 -1.099867 0.685485  
1 -5.983345 0.138038 -0.088057  
1 -4.599403 2.209071 -0.140983  
6 -0.907973 0.067049 1.475281  
1 -2.624980 -2.074633 1.425941  
1 -4.994105 -2.004458 0.689128  
6 -0.211472 1.226229 1.415212  
6 -0.824906 2.436967 0.918746  
1 0.835697 1.303885 1.675310  
8 -2.149995 2.374773 0.565003  
8 -0.379752 -1.126952 1.842644  
8 -0.261891 3.503824 0.789414  
6 0.958591 -1.365324 1.581888  
6 1.259482 -2.080270 0.400632  
6 1.943640 -0.967890 2.466418  
6 2.610965 -2.377827 0.127490  
1 0.444405 -2.554793 -0.151333  
6 3.272733 -1.264444 2.156508  
1 1.680926 -0.435721 3.373940  
6 3.612189 -1.953626 0.994205  
1 2.851907 -2.963358 -0.753844  
1 4.053172 -0.948021 2.841031  
1 4.652152 -2.169542 0.776780  
46 1.210288 -0.201113 -0.928766  
8 -0.492602 -0.609058 -1.874594  
6 -1.351296 -1.582656 -1.796038  
8 -1.187007 -2.656455 -1.217572  
6 -2.641047 -1.259806 -2.519493  
6 2.436830 1.919777 -0.897438  
8 1.477828 1.768610 -1.712822  
8 2.778094 0.890234 -0.207283  
6 3.104003 3.231942 -0.696918  
1 4.066729 3.101094 -0.200965  
1 2.449607 3.844585 -0.067435  
1 3.226887 3.738775 -1.656029  
1 -2.435912 -1.072458 -3.577232  
1 -3.074945 -0.346844 -2.101499  
1 -3.346544 -2.085113 -2.419197

**IM7**

**E= -1386.644469 a.u.**

**G= -1386.377878 a.u.**

6 4.248581 -1.279031 -0.602608  
6 3.807954 -0.031341 -1.012425

6 2.468587 0.130180 -1.360065  
6 1.571428 -0.938427 -1.291842  
6 2.032983 -2.192408 -0.867347  
6 3.364894 -2.363219 -0.533860  
1 5.291739 -1.413734 -0.335458  
1 4.475667 0.821126 -1.069806  
6 0.183733 -0.653607 -1.596836  
1 1.328685 -3.014458 -0.803705  
1 3.723548 -3.336070 -0.214437  
6 -0.183690 0.570849 -2.046847  
6 0.772677 1.649584 -2.119102  
1 -1.213324 0.825347 -2.261681  
8 2.072616 1.373478 -1.749399  
8 -0.660816 -1.678811 -1.378302  
8 0.531024 2.791609 -2.449645  
6 -1.974924 -1.422265 -0.982008  
6 -2.258299 -0.594167 0.108408  
6 -2.972840 -2.095958 -1.672249  
6 -3.590846 -0.450532 0.488148  
1 1.550944 0.558538 1.861516  
6 -4.296959 -1.950859 -1.268170  
1 -2.699716 -2.726237 -2.512860  
6 -4.605759 -1.127521 -0.190248  
1 -3.845131 0.199050 1.321451  
1 -5.083378 -2.475701 -1.801178  
1 -5.637434 -1.005105 0.125294  
46 -0.853263 0.435807 0.999080  
8 0.050332 -1.324041 1.723822  
6 1.228888 -1.325881 2.106430  
8 2.005766 -0.270159 2.128884  
6 1.865404 -2.566209 2.634533  
6 -0.246827 2.865220 0.885915  
8 0.544920 2.094281 1.519620  
8 -1.337311 2.395277 0.422001  
6 0.101727 4.297373 0.644829  
1 -0.798452 4.914219 0.671177  
1 0.537244 4.372567 -0.357369  
1 0.830599 4.642481 1.379160  
1 2.938669 -2.559098 2.443695  
1 1.392382 -3.443612 2.194718  
1 1.705521 -2.590197 3.718002

**IM8**

**E= -1386.652837 a.u.**

**G= -1386.387161 a.u.**

46 0.584462 -0.251027 0.057145  
6 1.723411 1.336376 -0.242665  
6 1.078851 2.573775 -0.299096  
6 1.738929 3.766247 -0.538263  
6 3.118343 3.723475 -0.734421  
6 3.792488 2.506840 -0.698231  
6 3.096661 1.318560 -0.460718  
8 -0.797540 -1.865474 0.322271  
6 -0.605196 -2.915035 -0.368209  
8 0.511319 -3.262298 -0.835642  
6 -1.815624 -3.755201 -0.682116  
1 1.186053 4.699173 -0.572440  
1 3.660069 4.645124 -0.920865  
1 4.866600 2.477525 -0.854029  
1 3.635674 0.375549 -0.438781  
1 0.012814 0.988506 -2.187474  
6 -0.677690 0.669683 -1.412996

6 -0.994885 1.526387 -0.346476  
6 -1.684050 -0.301303 -1.875315  
8 -1.560205 -0.992857 -2.856760  
8 -0.292713 2.621003 -0.040642  
1 -2.559168 -3.675513 0.112786  
1 -1.537227 -4.796748 -0.849110  
1 -2.259380 -3.362108 -1.604004  
6 -2.221123 1.335150 0.394406  
6 -3.096525 0.338310 -0.052399  
6 -4.595155 0.828740 1.745204  
6 -4.287354 0.082820 0.617825  
6 -2.547290 2.077770 1.538781  
6 -3.729526 1.826650 2.208809  
1 -5.521861 0.631045 2.274354  
1 -4.946367 -0.694330 0.248133  
1 -1.857041 2.838125 1.886594  
1 -3.982789 2.396431 3.096085  
8 -2.843861 -0.411863 -1.163413  
1 1.715930 -2.868474 -0.187777  
8 2.035557 -0.996264 1.418480  
6 2.788322 -1.972452 1.240959  
8 2.644899 -2.861359 0.316995  
6 3.971262 -2.173647 2.137344  
1 3.885595 -3.143532 2.634591  
1 4.030942 -1.376163 2.876513  
1 4.882141 -2.193319 1.531898

**IM8-2**

**E= -1386.657933 a.u.**

**G= -1386.392157 a.u.**

46 0.584462 -0.251027 0.057145  
6 1.723411 1.336376 -0.242665  
6 1.078851 2.573775 -0.299096  
6 1.738929 3.766247 -0.538263  
6 3.118343 3.723475 -0.734421  
6 3.792488 2.506840 -0.698231  
6 3.096661 1.318560 -0.460718  
8 -0.797540 -1.865474 0.322271  
6 -0.605196 -2.915035 -0.368209  
8 0.511319 -3.262298 -0.835642  
6 -1.815624 -3.755201 -0.682116  
1 1.186053 4.699173 -0.572440  
1 3.660069 4.645124 -0.920865  
1 4.866600 2.477525 -0.854029  
1 3.635674 0.375549 -0.438781  
1 0.012814 0.988506 -2.187474  
6 -0.677690 0.669683 -1.412996  
6 -0.994885 1.526387 -0.346476  
6 -1.684050 -0.301303 -1.875315  
8 -1.560205 -0.992857 -2.856760  
8 -0.292713 2.621003 -0.040642  
1 -2.559168 -3.675513 0.112786  
1 -1.537227 -4.796748 -0.849110  
1 -2.259380 -3.362108 -1.604004  
6 -2.221123 1.335150 0.394406  
6 -3.096525 0.338310 -0.052399  
6 -4.595155 0.828740 1.745204  
6 -4.287354 0.082820 0.617825  
6 -2.547290 2.077770 1.538781  
6 -3.729526 1.826650 2.208809  
1 -5.521861 0.631045 2.274354  
1 -4.946367 -0.694330 0.248133

1 -1.8570412.838125 1.886594  
1 -3.9827892.396431 3.096085  
8 -2.843861-0.411863-1.163413  
1 1.715930 -2.868474-0.187777  
8 2.035557 -0.996264 1.418480  
6 2.788322 -1.972452 1.240959  
8 2.644899 -2.861359 0.316995  
6 3.971262 -2.173647 2.137344  
1 3.885595 -3.143532 2.634591  
1 4.030942 -1.376163 2.876513  
1 4.882141 -2.193319 1.531898

**Pd(HOAc)<sub>2</sub>**

**E= -584.793105 a.u.**

**G= -584.705649 a.u.**

46 0.000004 0.531433 0.000003  
8 2.083642 0.536139 0.490612  
6 2.811068 -0.316683 -0.017535  
8 2.338448 -1.255968 -0.816516  
6 4.283905 -0.376838 0.207136  
1 1.363070 -1.099306 -0.890098  
1 4.587079 0.408305 0.897889  
1 4.798959 -0.254451 -0.749803  
1 4.555063 -1.357688 0.606289  
1 -1.363086 -1.099359 0.890082  
8 -2.083636 0.536132 -0.490619  
6 -2.811068 -0.316689 0.017523  
8 -2.338464 -1.255999 0.816482  
6 -4.283910 -0.376813 -0.207114  
1 -4.798924 -0.253989 0.749795  
1 -4.555180 -1.357804 -0.605842  
1 -4.587041 0.408091 -0.898155

**PC**

**E= -801.846274 a.u.**

**G= -801.690707 a.u.**

6 4.379902 -0.491942 0.000334  
6 3.652879 0.688516 0.000280  
6 2.262394 0.623433 0.000012  
6 1.602953 -0.615378 -0.000162  
6 2.352997 -1.798965 -0.000065  
6 3.734831 -1.734847 0.000165  
1 5.464304 -0.446884 0.000523  
1 4.136244 1.659063 0.000402  
6 0.176108 -0.518742 -0.000243  
1 1.836080 -2.752877 -0.000151  
1 4.318323 -2.649347 0.000240  
6 -0.495098 0.670988 -0.000386  
6 0.212496 1.925086 -0.000730  
8 1.588633 1.815487 -0.000129  
8 -0.657215 -1.577969 -0.000186  
8 -0.267224 3.036509 0.000271  
6 -1.936760 -1.055159 -0.000057  
6 -1.900055 0.344325 -0.000081  
6 -3.105688 -1.795601 0.000112  
6 -3.098456 1.060586 0.000062  
6 -4.289561 -1.064934 0.000264  
1 -3.092453 -2.879674 0.000133  
6 -4.284985 0.338779 0.000238  
1 -3.090819 2.144881 0.000008  
1 -5.237247 -1.593777 0.000398  
1 -5.231712 0.869524 0.000341

**Pd(OAc)<sub>2</sub>**

**E= -583.579026 a.u.**

**G= -583.512283 a.u.**

46 -0.000002 0.000005 0.000022  
8 -1.747715 1.082779 -0.019641  
6 -2.423608 -0.000004 -0.019668  
8 -1.747704 -1.082779 -0.019670  
6 -3.910101 -0.000011 0.015394  
6 2.423604 -0.000004 0.019402  
8 1.747716 1.082781 0.019480  
8 1.747702 -1.082780 0.019509  
6 3.910109 -0.000014 -0.015086  
1 4.297383 -0.899434 0.468221  
1 4.297395 0.899219 0.468562  
1 4.234213 0.000196 -1.062084  
1 -4.297558 0.899285 -0.467996  
1 -4.233831 0.000049 1.062509  
1 -4.297549 -0.899364 -0.467896

**TS0**

**E= -1386.622722 a.u.**

**G= -1386.359592 a.u.**

**Frequency= -121.57 cm<sup>-1</sup>**

6 4.279882 -2.069259 -0.297956  
6 3.804607 -1.471982 0.857754  
6 2.435423 -1.255281 0.990329  
6 1.545333 -1.642366 -0.016530  
6 2.044440 -2.245415 -1.180462  
6 3.403687 -2.455553 -1.321021  
1 5.346471 -2.234973 -0.411152  
1 4.467315 -1.157237 1.655883  
6 0.142381 -1.346970 0.191275  
1 1.351672 -2.533057 -1.963280  
1 3.791331 -2.918619 -2.221856  
6 -0.246398 -0.589153 1.273480  
6 0.701549 -0.302580 2.343335  
1 -1.286447 -0.418710 1.518050  
8 2.013875 -0.658405 2.137091  
8 -0.669732 -1.855681 -0.734480  
8 0.424282 0.209644 3.402082  
6 -2.059629 -1.780102 -0.607618  
6 -2.751486 -1.114004 -1.606792  
6 -2.704422 -2.437399 0.431773  
6 -4.142027 -1.095446 -1.552613  
1 -2.204846 -0.614559 -2.398092  
6 -4.095195 -2.399371 0.478679  
1 -2.130271 -2.964348 1.186861  
6 -4.813783 -1.732458 -0.511382  
1 -4.698449 -0.575514 -2.325728  
1 -4.615043 -2.901698 1.288014  
1 -5.898231 -1.711623 -0.472153  
46 0.141250 1.485605 -0.135673  
8 -1.743811 1.607004 -0.713382  
6 -2.402702 1.973476 0.346494  
8 -1.805313 2.196385 1.408812  
6 -3.893730 2.052224 0.209744  
6 2.423930 1.668846 -1.076038  
8 1.459705 1.862768 -1.869890  
8 2.143545 1.491495 0.164866  
6 3.836348 1.586545 -1.541028  
1 4.522823 1.713814 -0.703229  
1 4.022493 2.336070 -2.312691

1 3.991530 0.595585 -1.981084  
1 -4.179040 2.292896 -0.815819  
1 -4.293473 2.792457 0.904796  
1 -4.314972 1.073510 0.463089

### TS1

E= -1386.619736 a.u.

G= -1386.359282 a.u.

Frequency= -906.53 cm<sup>-1</sup>

6 -5.590009 -0.202639 0.458656  
6 -4.853200 -0.108084 -0.709803  
6 -3.468730 -0.247845 -0.646725  
6 -2.823340 -0.478176 0.573289  
6 -3.590528 -0.570320 1.748133  
6 -4.962995 -0.433049 1.690767  
1 -6.669020 -0.093663 0.414836  
1 -5.321448 0.068826 -1.671440  
6 -1.384962 -0.593501 0.551747  
1 -3.087843 -0.746018 2.692508  
1 -5.553670 -0.502590 2.597616  
6 -0.663607 -0.491681 -0.636041  
6 -1.413405 -0.252030 -1.873038  
1 0.140960 -1.445378 -0.896462  
8 -2.788954 -0.154190 -1.818146  
8 -0.858418 -0.808777 1.749305  
8 -0.916665 -0.152974 -2.972092  
6 0.522704 -0.948154 1.928806  
6 1.227322 0.148908 2.406682  
6 1.122061 -2.172781 1.685913  
6 2.599036 0.020195 2.601547  
1 0.707609 1.083300 2.590156  
6 2.495995 -2.284146 1.885172  
1 0.532218 -3.006725 1.322801  
6 3.233222 -1.190691 2.332416  
1 3.171179 0.871833 2.954126  
1 2.988428 -3.230825 1.687409  
1 4.304368 -1.284595 2.478167  
46 1.020852 0.755010 -0.603146  
8 2.348185 -0.609522 -1.295048  
6 2.100539 -1.833061 -1.521052  
8 0.978375 -2.381988 -1.346918  
6 3.231421 -2.671554 -2.047389  
6 1.134298 3.128641 0.065412  
8 2.196639 2.577162 -0.340019  
8 0.061846 2.422182 0.109743  
6 1.084550 4.564889 0.468738  
1 2.092087 4.960917 0.599231  
1 0.507121 4.672000 1.389912  
1 0.573632 5.130991 -0.316513  
1 4.186768 -2.164521 -1.913819  
1 3.062162 -2.848355 -3.114058  
1 3.235942 -3.640333 -1.543744

### TS2

E= -1386.612422 a.u.

G= -1386.353230 a.u.

Frequency= -1011.78 cm<sup>-1</sup>

46 1.052367 -0.180682 -0.220842  
6 -0.899901 -0.402800 -0.361624  
6 -1.783022 0.401224 0.272663  
6 -3.168810 0.030758 0.476795  
6 -3.578003 -1.184744 -0.076080

6 -1.414818 -1.576416 -1.054543  
8 3.173006 0.044749 0.170238  
6 3.418548 0.803059 1.171374  
8 2.561338 1.591076 1.645096  
6 4.786170 0.721143 1.784653  
1 1.457813 1.586448 0.755959  
6 0.719974 1.885450 -0.268350  
6 -0.561942 2.372545 0.025812  
6 1.528835 2.682176 -1.110202  
8 -1.458831 1.635323 0.768911  
1 4.901020 -0.261769 2.252680  
1 4.927300 1.498383 2.535023  
1 5.545093 0.803784 1.002790  
6 -1.005351 3.611567 -0.413356  
6 -0.171965 4.373696 -1.225085  
1 3.528402 -1.531328 0.005484  
8 1.300213 -2.317685 -0.013907  
6 2.321817 -3.009905 -0.041099  
8 3.539505 -2.527513 -0.057419  
6 2.224321 -4.500736 -0.040991  
1 3.189894 -4.966010 -0.236909  
1 1.488415 -4.803348 -0.788627  
1 1.855407 -4.824277 0.937099  
6 -4.097385 0.793947 1.198584  
6 -5.391739 0.332679 1.367690  
6 -5.779260 -0.892759 0.813503  
6 -4.878032 -1.655842 0.087725  
1 -3.784022 1.740456 1.624915  
1 -6.106309 0.923458 1.931224  
1 -6.794900 -1.251472 0.947427  
1 -5.156807 -2.603444 -0.359919  
8 -2.728204 -1.940948 -0.823564  
8 -0.808143 -2.268889 -1.844749  
6 1.091586 3.905948 -1.590612  
1 -2.001829 3.947920 -0.148336  
1 -0.519312 5.336325 -1.588200  
1 1.730242 4.504573 -2.231447  
1 2.533494 2.336820 -1.338436

### TS3

E= -1386.627239 a.u.

G= -1386.363256 a.u.

Frequency= -279.29 cm<sup>-1</sup>

46 0.955675 0.120243 -0.015350  
6 -0.990956 0.014023 -0.484292  
6 -1.966535 0.519256 0.343898  
6 -3.192666 -0.165903 0.642419  
6 -3.420720 -1.346841 -0.067586  
6 -1.313713 -1.199573 -1.211859  
8 3.104280 0.779052 0.616803  
6 3.825061 0.318886 1.495519  
8 3.678610 -0.896375 1.997339  
6 4.956691 1.078327 2.113261  
1 2.953770 -1.370969 1.515897  
6 -0.070515 1.670995 -0.773883  
6 -0.909364 2.459935 0.023216  
6 0.627092 2.332934 -1.806074  
8 -1.831929 1.780634 0.790958  
1 5.067099 2.047701 1.629384  
1 5.882371 0.503685 2.024641  
1 4.755618 1.217504 3.179585  
6 -0.969321 3.843656 -0.049418

6 -0.202525 4.474568 -1.020883  
1 0.955590 -2.215800 -1.803006  
8 1.906436 -2.028518 0.363498  
6 2.395423 -2.641734 -0.596335  
8 1.836335 -2.690377 -1.772465  
6 3.671244 -3.411910 -0.476380  
1 4.119367 -3.589579 -1.453892  
1 3.448904 -4.375791 -0.007187  
1 4.363588 -2.873460 0.173527  
6 -4.162514 0.277227 1.554336  
6 -5.312841 -0.465240 1.750894  
6 -5.518403 -1.651444 1.034554  
6 -4.577567 -2.096976 0.119325  
1 -3.993246 1.200983 2.097336  
1 -6.059786 -0.126633 2.461093  
1 -6.424646 -2.227429 1.191418  
1 -4.717209 -3.008265 -0.451793  
8 -2.519512 -1.801760 -0.988927  
8 -0.601546 -1.768505 -2.035707  
6 0.566627 3.716942 -1.911524  
1 -1.635901 4.395256 0.605467  
1 -0.237012 5.555273 -1.114755  
1 1.132164 4.217583 -2.691992  
1 1.239898 1.762795 -2.496722

**TS<sub>IM2-3</sub>**

**E= -1386.634650 a.u.**

**G= -1386.370603 a.u.**

**Frequency= -51.36 cm<sup>-1</sup>**

6 -6.000564 0.101330 -0.262946  
6 -5.075396 1.036348 -0.698995  
6 -3.718417 0.763484 -0.547401  
6 -3.279161 -0.430638 0.030844  
6 -4.229932 -1.364074 0.467566  
6 -5.580373 -1.098930 0.321720  
1 -7.060180 0.305226 -0.379603  
1 -5.377120 1.972849 -1.154950  
6 -1.846082 -0.621896 0.139437  
1 -3.890346 -2.290084 0.918135  
1 -6.313256 -1.823612 0.660285  
6 -0.979023 0.316562 -0.311265  
6 -1.477893 1.542494 -0.892081  
1 3.106720 1.626249 0.436645  
8 -2.841180 1.708869 -0.989460  
8 -1.482066 -1.781256 0.732000  
8 -0.786627 2.455186 -1.305042  
6 -0.142965 -2.148142 0.727306  
6 0.508684 -2.257937 1.954694  
6 0.476228 -2.529601 -0.466009  
6 1.808997 -2.747757 1.981787  
1 -0.011872 -1.962743 2.859249  
6 1.781862 -3.023473 -0.415808  
1 -0.067984 -2.475029 -1.403376  
6 2.446607 -3.128636 0.800015  
1 2.326754 -2.833814 2.931624  
1 2.271540 -3.315107 -1.338646  
1 3.461368 -3.511472 0.831911  
46 0.957637 0.202432 -0.193051  
8 0.879047 1.770498 1.311920  
6 1.800946 2.577753 1.487068  
8 2.995144 2.465674 0.965487  
6 1.611640 3.794176 2.332995

6 3.210453 -0.148850 -1.537947  
8 3.107767 0.149006 -0.281845  
8 2.191434 -0.354834 -2.225353  
6 4.592875 -0.259183 -2.112719  
1 5.142341 -1.042634 -1.582355  
1 5.128622 0.681800 -1.957959  
1 4.551960 -0.490772 -3.177253  
1 0.647625 3.752230 2.837425  
1 1.649938 4.677703 1.688438  
1 2.423513 3.873981 3.059544

**TS4**

**E= -1386.619837 a.u.**

**G= -1386.357481 a.u.**

**Frequency= -118.93 cm<sup>-1</sup>**

6 -4.338162 -2.446615 -1.195652  
6 -4.771343 -1.312685 -0.528057  
6 -3.906541 -0.226649 -0.417977  
6 -2.623207 -0.263112 -0.968970  
6 -2.199814 -1.422475 -1.634287  
6 -3.052896 -2.504980 -1.748691  
1 -5.005227 -3.298047 -1.285193  
1 -5.758954 -1.248309 -0.085327  
6 -1.787502 0.903026 -0.766330  
1 -1.195870 -1.459855 -2.040509  
1 -2.722336 -3.401708 -2.261440  
6 -2.257936 1.979612 -0.093672  
6 -3.597228 1.988296 0.450824  
1 -1.676729 2.878147 0.064300  
8 -4.362408 0.858314 0.270534  
8 -0.570007 0.811610 -1.339374  
8 -4.104624 2.907735 1.056143  
6 0.517462 1.548403 -0.913981  
6 0.771478 1.804581 0.440177  
6 1.409651 1.951064 -1.901809  
6 1.930124 2.510625 0.784967  
1 0.054423 1.539258 1.207740  
6 2.562513 2.635192 -1.532668  
1 1.190053 1.724897 -2.939479  
6 2.826230 2.920495 -0.193268  
1 2.119303 2.720334 1.832445  
1 3.260427 2.951584 -2.301171  
1 3.727655 3.456441 0.082958  
46 1.788163 -0.651506 0.569408  
8 -0.012865 -1.455457 0.695145  
6 -0.484374 -1.094521 1.848814  
8 0.204621 -0.409406 2.621941  
6 -1.890098 -1.509011 2.168884  
6 3.966953 -1.197089 -0.426694  
8 3.008118 -2.016033 -0.567455  
8 3.731622 -0.137725 0.254969  
6 5.315756 -1.443691 -1.004389  
1 5.716410 -0.514072 -1.414356  
1 5.264150 -2.213954 -1.774698  
1 5.985691 -1.778774 -0.206315  
1 -2.280083 -2.209667 1.429183  
1 -2.520715 -0.614471 2.195535  
1 -1.915749 -1.957639 3.164999

**TS5**

**E= -1386.612008 a.u.**

**G= -1386.351296 a.u.**

Frequency= -1000.58 cm<sup>-1</sup>

6 -4.725962 -0.017282 0.203130  
6 -4.005179 1.145392 0.423354  
6 -2.697268 1.047184 0.891058  
6 -2.112024 -0.196908 1.141985  
6 -2.851883 -1.363918 0.902668  
6 -4.152471 -1.272701 0.439987  
1 -5.744864 0.051083 -0.164541  
1 -4.428451 2.126067 0.237540  
6 -0.731174 -0.191129 1.569850  
1 -2.385383 -2.328328 1.069311  
1 -4.724539 -2.175298 0.253590  
6 -0.068305 0.972660 1.765626  
6 -0.702771 2.240808 1.485886  
1 0.972203 1.006597 2.062652  
8 -2.013767 2.212245 1.072739  
8 -0.173779 -1.411383 1.741455  
8 -0.175433 3.329674 1.581314  
6 1.157897 -1.608337 1.404611  
6 1.538644 -1.546141 0.049701  
6 2.030437 -1.978573 2.412426  
6 2.867881 -1.899556 -0.252875  
1 0.599548 -2.013196 -0.694519  
6 3.345487 -2.290597 2.072126  
1 1.682266 -2.025449 3.438562  
6 3.766841 -2.256652 0.743562  
1 3.189733 -1.893308 -1.290129  
1 4.043503 -2.572827 2.854156  
1 4.790076 -2.514582 0.491779  
46 0.928223 0.201878 -1.029307  
8 -0.740181 -0.491269 -1.932193  
6 -1.110712 -1.706315 -1.868390  
8 -0.465510 -2.606344 -1.268219  
6 -2.379285 -2.061447 -2.589586  
6 1.921045 2.439306 -0.900185  
8 0.889879 2.243982 -1.617761  
8 2.446181 1.416785 -0.334396  
6 2.476882 3.800949 -0.676945  
1 3.555959 3.749724 -0.522233  
1 2.010427 4.204451 0.227923  
1 2.232527 4.452308 -1.517249  
1 -2.137167 -2.241733 -3.642065  
1 -3.087202 -1.233177 -2.537586  
1 -2.814495 -2.968719 -2.170535

1 -2.104774 4.965029 -0.562196  
1 -2.485011 2.581996 -1.004727  
1 0.406149 -1.093200 0.831305  
6 0.858970 -0.489244 -0.144177  
6 1.850582 0.408437 0.258168  
6 1.286310 -1.591967 -1.029682  
8 0.551562 -2.340582 -1.625811  
8 1.605566 1.563937 0.832806  
1 -2.873975 -3.725276 1.908146  
1 -1.304308 -4.259361 2.584122  
1 -1.772748 -4.682526 0.915185  
6 3.251860 0.103525 0.118529  
6 3.585009 -1.052866 -0.595223  
6 5.911266 -0.619815 -0.248997  
6 4.915262 -1.419063 -0.785073  
6 4.278911 0.912179 0.636778  
6 5.598394 0.547448 0.461779  
1 6.950107 -0.900467 -0.390357  
1 5.140928 -2.318179 -1.347167  
1 4.016106 1.814746 1.176914  
1 6.391768 1.165039 0.868072  
8 2.638462 -1.842836 -1.163152  
1 -3.297786 -1.847809 0.009290  
8 -3.262463 0.496161 -0.342432  
6 -4.267103 -0.225315 -0.317663  
8 -4.244256 -1.515604 -0.121150  
6 -5.634579 0.343654 -0.524257  
1 -6.073835 -0.097954 -1.423424  
1 -5.580260 1.426014 -0.631342  
1 -6.275236 0.077453 0.320467

TS6

E= -1386.619256 a.u.

G= -1386.357911 a.u.

Frequency= -383.14 cm<sup>-1</sup>

46 -1.140523 0.000962 -0.209903  
6 -0.639732 1.904306 -0.133023  
6 0.508854 2.373483 0.494809  
6 0.732440 3.713487 0.797271  
6 -0.216115 4.654316 0.425445  
6 -1.363414 4.237114 -0.246360  
6 -1.569952 2.886624 -0.509308  
8 -1.784877 -2.058420 0.198810  
6 -1.182947 -2.654544 1.157478  
8 -0.101615 -2.250129 1.648197  
6 -1.818779 -3.910441 1.689140  
1 1.649331 3.997747 1.303596  
1 -0.052862 5.704393 0.645710
